# Supplementary material for: Variability of depolarization of aerosol particles in the megacity of Beijing: implications for the interaction between anthropogenic pollutants and mineral dust particles
Source: Copernicus journal article supplement (doi:10.5194/acp-18-18203-2018), 2018-12-21
Supplement: Supplementary file 1 [file acp-18-18203-2018-supplement.pdf]

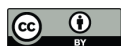

*Supplement of*

**Variability of depolarization of aerosol particles in the megacity of Beijing: implications for the interaction between anthropogenic pollutants and mineral dust particles**

**Yu Tian et al.**

*Correspondence to:* Xiaole Pan (panxiaole@mail.iap.ac.cn)

The copyright of individual parts of the supplement might differ from the CC BY 4.0 License.

---

## Supplementary

### Tables

**Table S1: Wind degree and corresponding wind speed.**

| Wind<br>degree      | 0           | 1           | 2           | 3           | 4           | 5            | 6             | 7             | 8             | 9             | 10            | 11            | 12            |
|---------------------|-------------|-------------|-------------|-------------|-------------|--------------|---------------|---------------|---------------|---------------|---------------|---------------|---------------|
| Wind<br>speed (m/s) | 0.0-0<br>.2 | 0.3-1<br>.5 | 1.6-3<br>.3 | 3.4-5<br>.4 | 5.5-7<br>.9 | 8.0-1<br>0.7 | 10.8-<br>13.8 | 13.9-<br>17.1 | 17.2-<br>20.7 | 20.8-<br>24.4 | 24.5-<br>28.4 | 28.5-<br>32.6 | 32.7-<br>36.9 |

## Figures

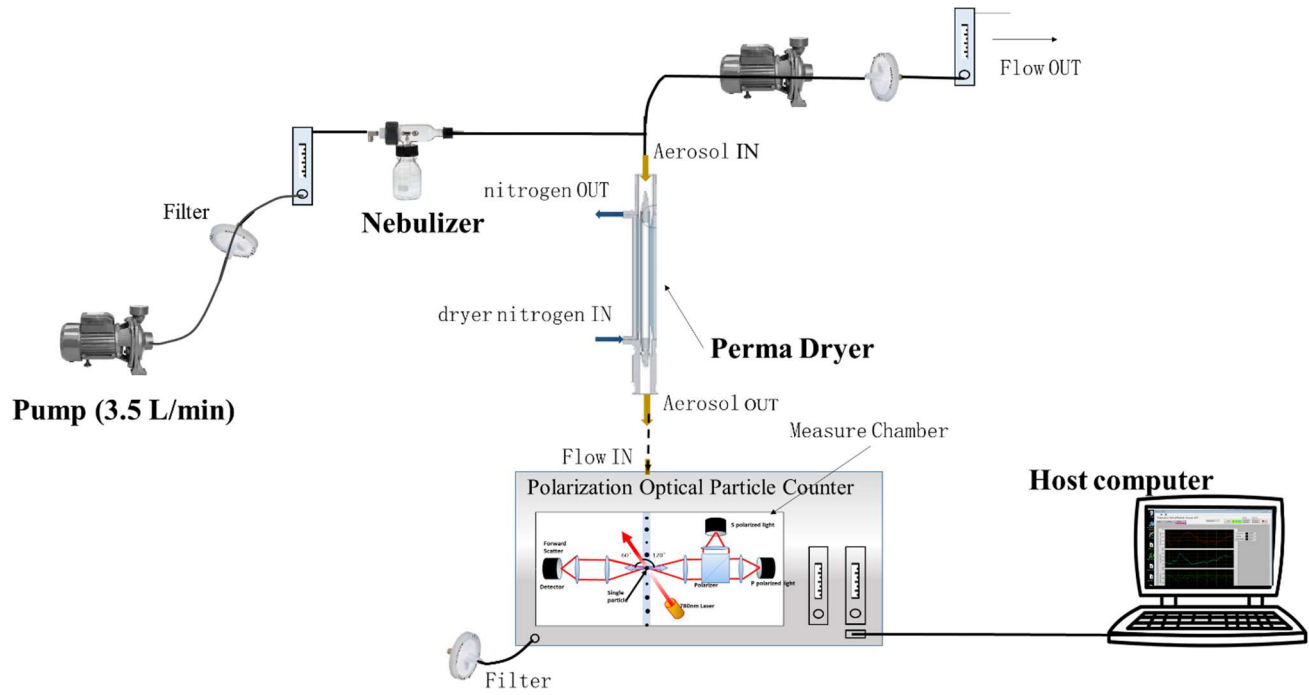

**Figure S1. A schematic diagram of the laboratory calibration process.**

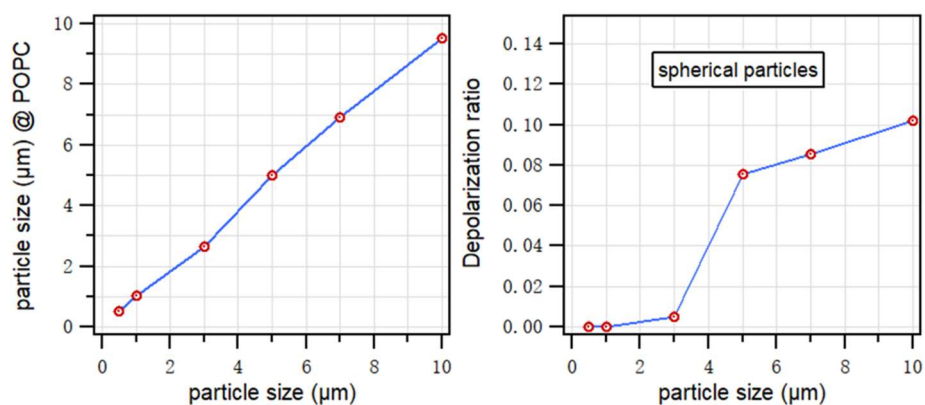

**Figure S2.** The calibration results of POPC using spherical polystyrene standard aerosols at  $D_p = 0.048 \mu\text{m}$ ,  $1.005 \mu\text{m}$ ,  $3.210 \mu\text{m}$ ,  $5.125 \mu\text{m}$ ,  $7.008 \mu\text{m}$ ,  $10.14 \mu\text{m}$ . Optical size of the particle derived from a forward scattering signal at 60 degree (left); Depolarization ratio of the standard particles detected from a backward scattering signal at 120 degree (right).

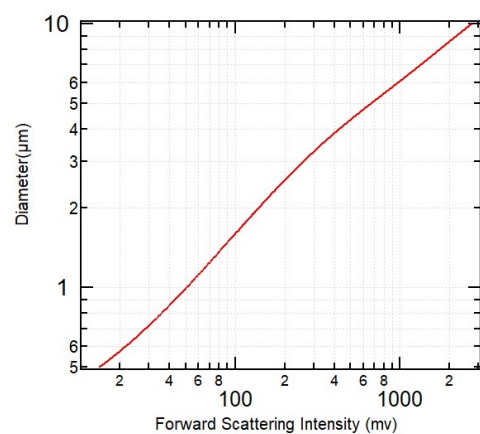

**Figure S3. Calibration curve between forward scattering intensity and standard spherical particles' diameter.**

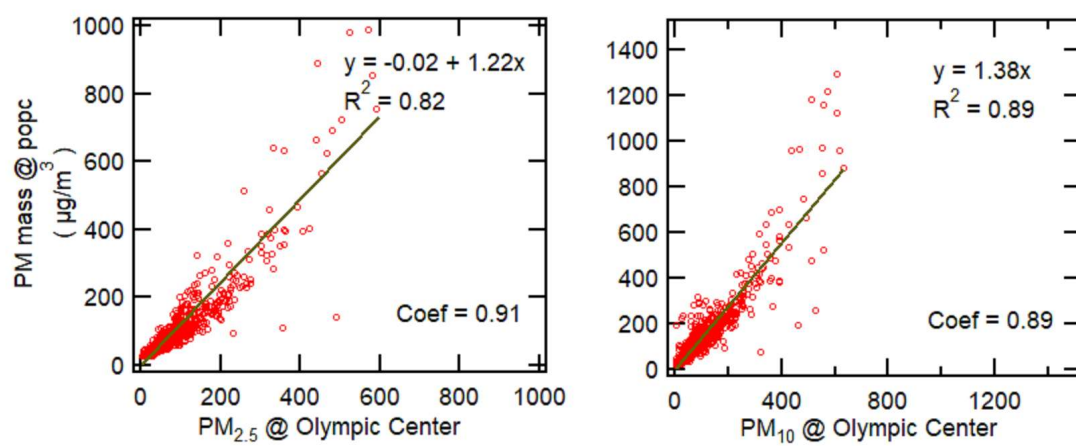

**Figure S4: Comparison of the POPC derived particle concentration and observation data from Olympic Center state control site at the same time.**

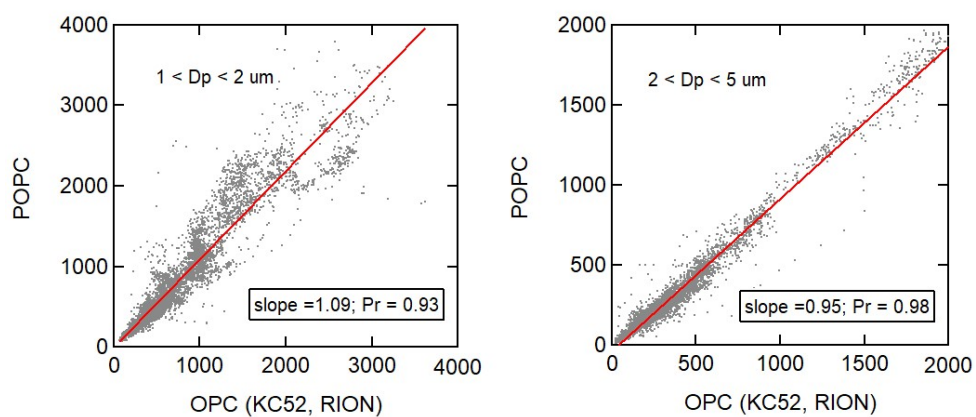

**Figure S5. The comparison of number concentrations measured by POPC and OPC (KC52, RION).**

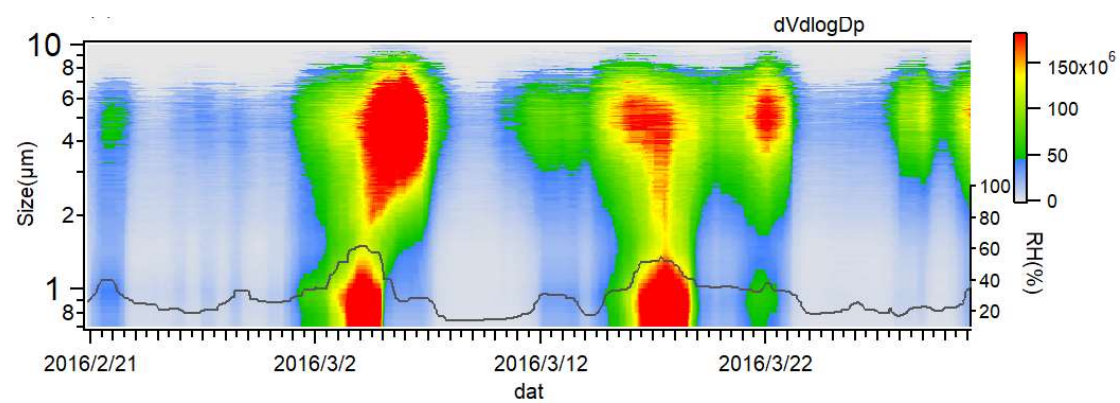

Figure S6. Volume size distribution of aerosols from February 21 to March 29, 2016.



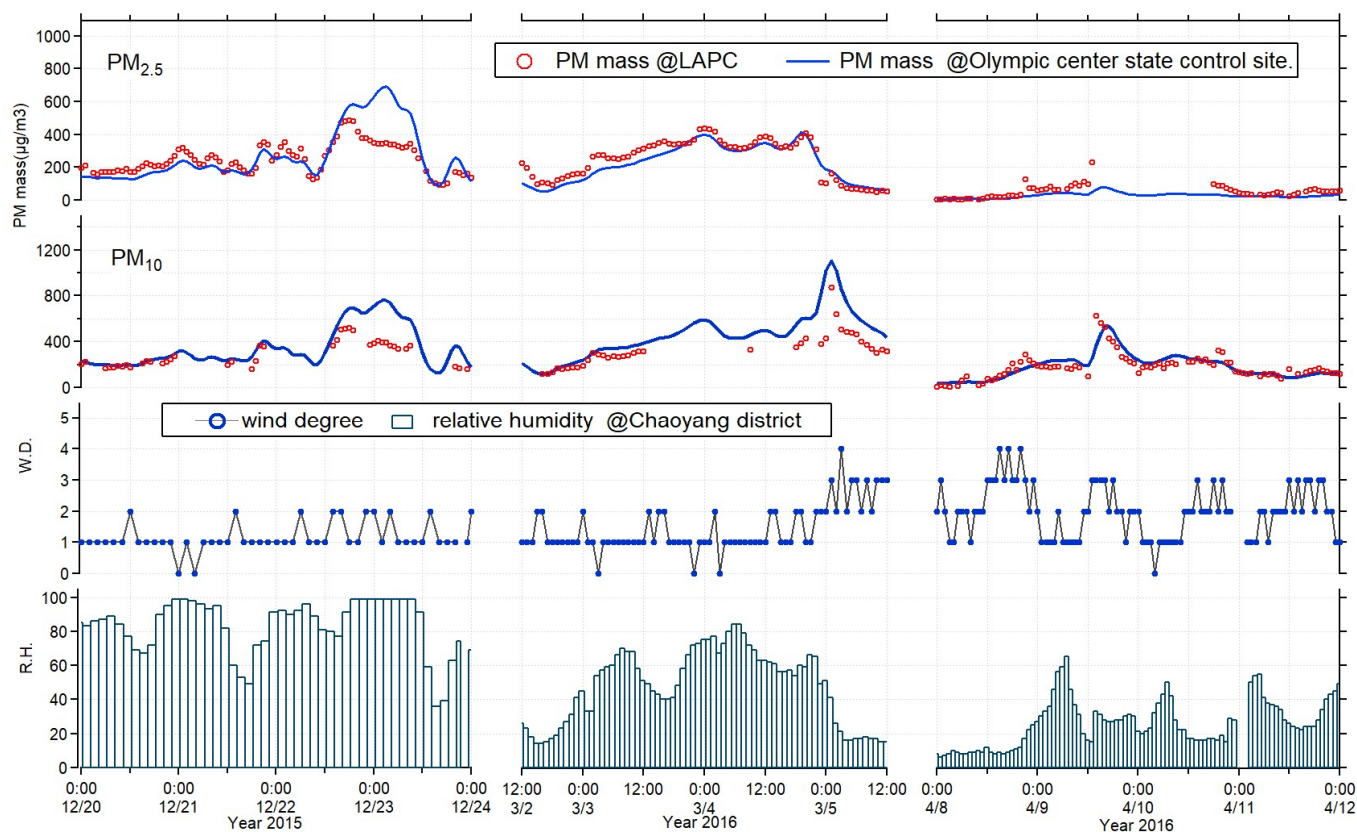

**Figure S7: Key meteorological factors and the air quality index during the mixing pollution period:  $\text{PM}_{2.5}$ ;  $\text{PM}_{10}$ ; W.D. represents the wind degree (corresponding table of specific wind degree and wind speed data is shown as Table S1); R.H. represents relative humidity (%).**

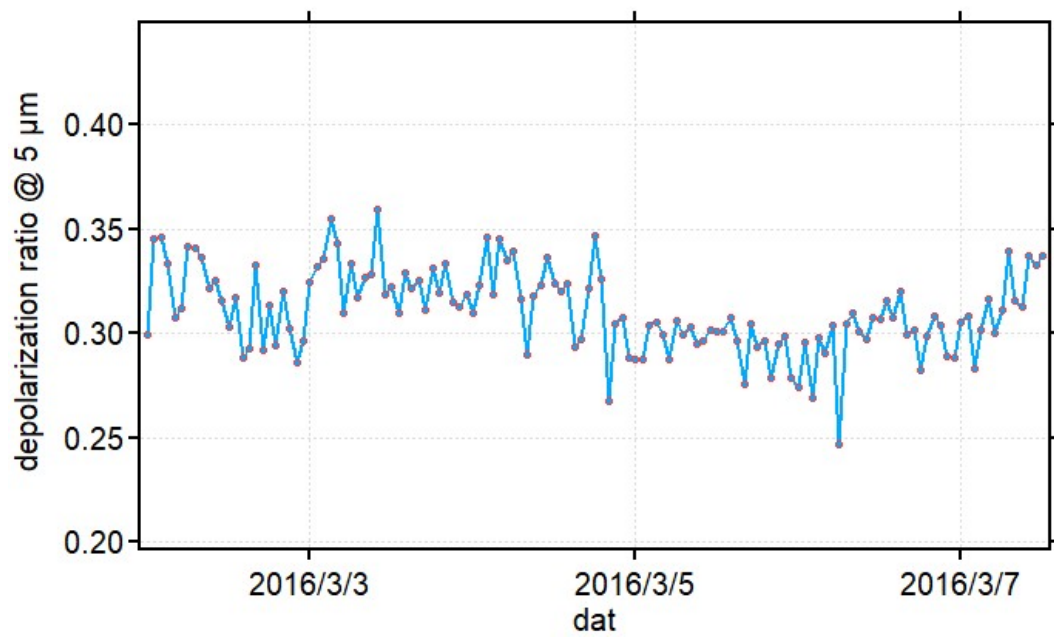

Figure S8. Depolarization ratio for 5 μm particles during case C.

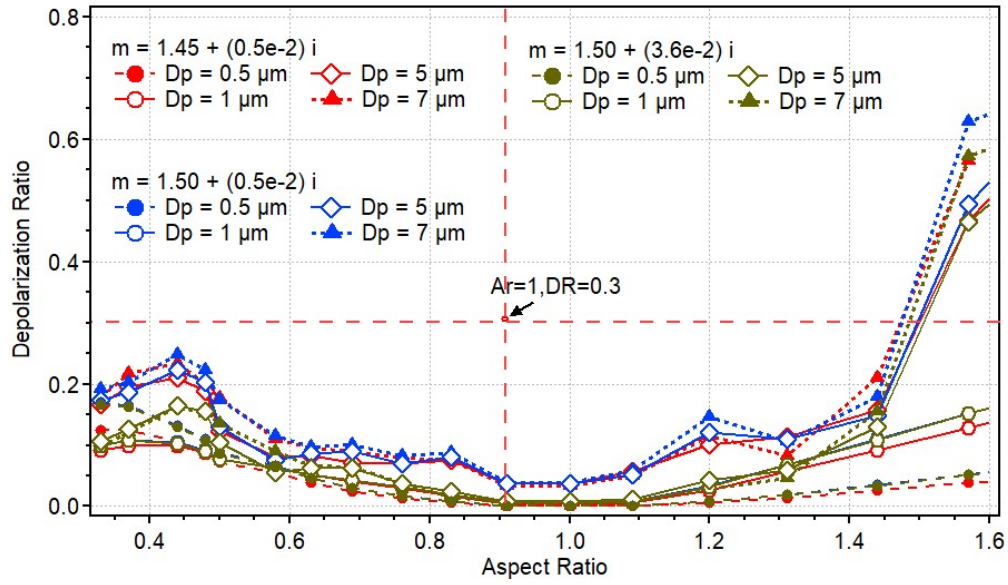

Figure S9. Teoretical simulation of the depolarization ratio of randomly oriented elongated ellipsoid particles as a function of the aspect ratio at fine mode:  $D_p = 0.5 \mu\text{m}$ ,  $D_p = 1 \mu\text{m}$ , and  $D_p = 5 \mu\text{m}$ ,  $7 \mu\text{m}$  and on the basis of the T-matrix methodology.

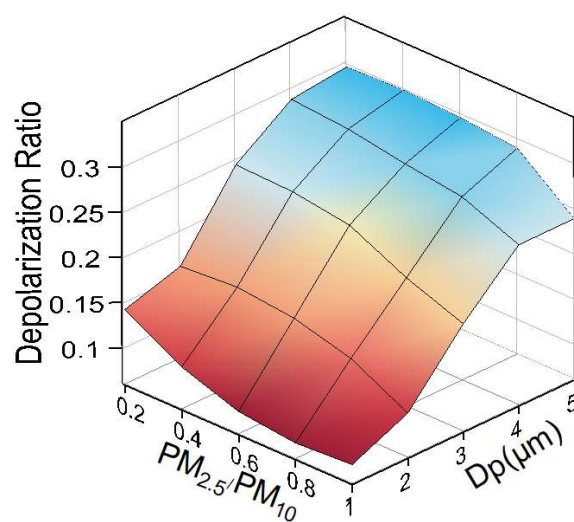

**Figure S10.** Surface plot of the depolarization ratio as a function of particle size (from 1  $\mu m$  to 5  $\mu m$ ) and  $PM_{2.5}/PM_{10}$  (from 0.2 to 1).

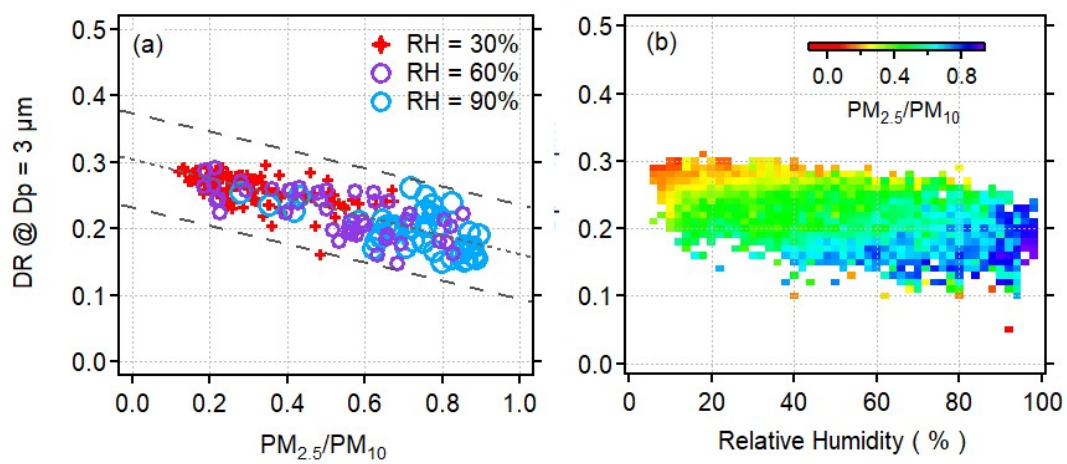

Figure S11. Scatter diagram of the relationship between the  $\delta$  value of dust particles (at  $D_p = 3 \mu\text{m}$ ), vapor content (RH) and  $\text{PM}_{2.5}/\text{PM}_{10}$  in the air.

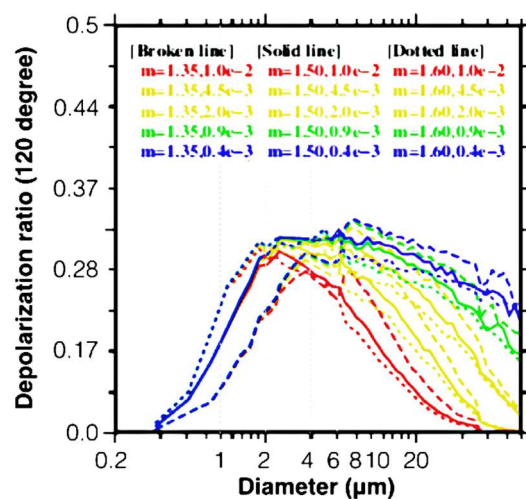

Figure S12. Theoretical calculation of depolarization ratio (at 120 backward direction) as a function of particle size for different refractive index.
